# Supplementary material for: A new strategy to enhance low-temperature capacitance: combination of two charge-storage mechanisms
Source: Royal Society of Chemistry journal article supplement (doi:10.1039/c3cp53747a), 2013-10-26
Supplement: c3cp53747a.pdf [file c3cp53747a.pdf]

## 1. Experimental Section

The precursor of nickel hydroxide was synthesized by hydrothermal reaction according to the literature.<sup>1</sup> In a typical procedure, 1.6 g NiCl<sub>2</sub>·6H<sub>2</sub>O was dissolved in 40 mL 6 M aqueous ammonia under stirring for 15 min. The resulting mixture was transferred into a 50 mL autoclave, heated at 180 °C for 12 h and then cooled to room temperature. After filtering and washing with deionized water and anhydrous ethanol for three times, respectively, the resulting solid product was dried at 80 °C under ambient atmosphere. NiO material was obtained by heating the as-prepared Ni(OH)<sub>2</sub> at 300 °C for 2 h.

The product was characterized by X-ray diffractometer (Bruker D8 advance) using Cu K $\alpha$  radiation ( $\lambda=0.15406$  nm). The electrochemical performances were studied with a CHI-660D electrochemical working station in a conventional three-electrode configuration equipped with a Pt foil of 1 cm<sup>2</sup> and a saturated calomel electrode as counter and reference electrodes, respectively. The electrolyte used was KOH solution with appropriate concentration of K<sub>3</sub>Fe(CN)<sub>6</sub>/K<sub>4</sub>Fe(CN)<sub>6</sub>. The work electrode was prepared by pressing the mixture of NiO, acetylene black and polytetrafluoroethylene with a weight ratio of 75: 15: 10 on a piece of foamed nickel of about 1 cm<sup>2</sup> (15 Mpa). Electrochemical impedance spectra were measured at equilibrium open-circuit potential (0 V), varying frequency from 0.01 to 100 000 Hz with amplitude of 5 mV.

1. J. Liang and Y. Li, *Chem. Lett.*, 2003, **32**, 1126.

## 2. XRD pattern of NiO

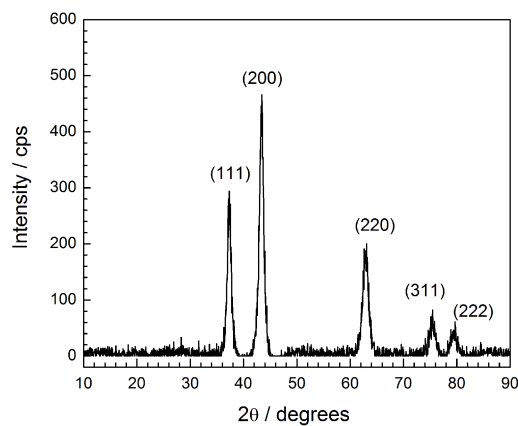

**Fig. S1** The XRD pattern of the as-prepared NiO material.

The peaks at the  $2\theta$  values of  $36.9^\circ$ ,  $43.0^\circ$ ,  $62.5^\circ$ ,  $74.9^\circ$  and  $79.0^\circ$  are ascribed to the planes of (111), (200), (220), (311) and (222) of NiO (JCPDS: 65-6920).

## 3. The fitting of electrochemical impedance spectroscopy

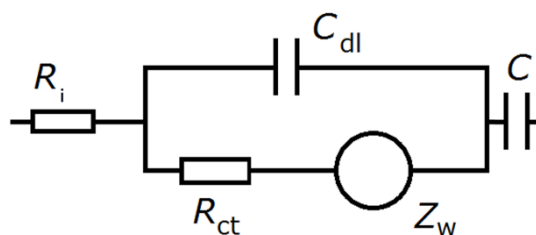

**Fig. S2** An equivalent circuit used to fit the Nyquist spectra.

**Tab. S1** The fitted impedance parameters of NiO electrode at different temperature in 4 M KOH based on the proposed equivalent circuit using the software Zview.

| temperature | $R_i / \Omega$ | $R_{ct} / \Omega$ | $C_{dl} / \text{mF}$ | $Z_w^{-1} / \Omega^{-1}$ | $C / F$ | Chi squared |
|-------------|----------------|-------------------|----------------------|--------------------------|---------|-------------|
| 15°C        | 1.138          | 0.426             | 3.03                 | 1.15                     | 0.612   | 8.48E-4     |
| 0°C         | 1.759          | 0.787             | 1.44                 | 0.5517                   | 0.414   | 6.34E-4     |
| -20°C       | 2.772          | 1.328             | 1.66                 | 0.3559                   | 0.826   | 6.80E-4     |

**Tab. S2** The fitted impedance parameters of NiO electrode at -20 °C in 4 M KOH including different concentration of  $\text{K}_3\text{Fe}(\text{CN})_6/\text{K}_4\text{Fe}(\text{CN})_6$ .

| electrolyte | $R_i / \Omega$ | $R_{ct} / \Omega$ | $C_{dl} / \text{mF}$ | $Z_w^{-1} / \Omega^{-1}$ | $C / F$ | Chi squared |
|-------------|----------------|-------------------|----------------------|--------------------------|---------|-------------|
| a           | 2.772          | 1.328             | 1.66                 | 0.3559                   | 0.826   | 6.80E-4     |
| b           | 2.037          | 0.748             | 2.38                 | 0.3817                   | 0.806   | 5.99E-4     |
| c           | 1.448          | 0.799             | 3.29                 | 0.4627                   | 0.825   | 1.07E-3     |
| d           | 1.027          | 0.581             | 3.68                 | 0.5739                   | 0.628   | 1.37E-3     |

a) 0 M, b) 0.001 M/0.001 M, c) 0.005 M /0.005 M and d) 0.009 M/0.009 M.
